# Supplementary material for: Satellite Data Reveals a Common Combustion Emission Pathway for Major Cities in China
Source: Copernicus journal article supplement (doi:10.5194/acp-2018-1121), 2018-12-04
Supplement: Supplementary file 1 [file acp-2018-1121-supplement.pdf]

# Supplement for Satellite Data Reveals a Common Combustion Emission Pathway for Major Cities in China

Tang et al., 2018

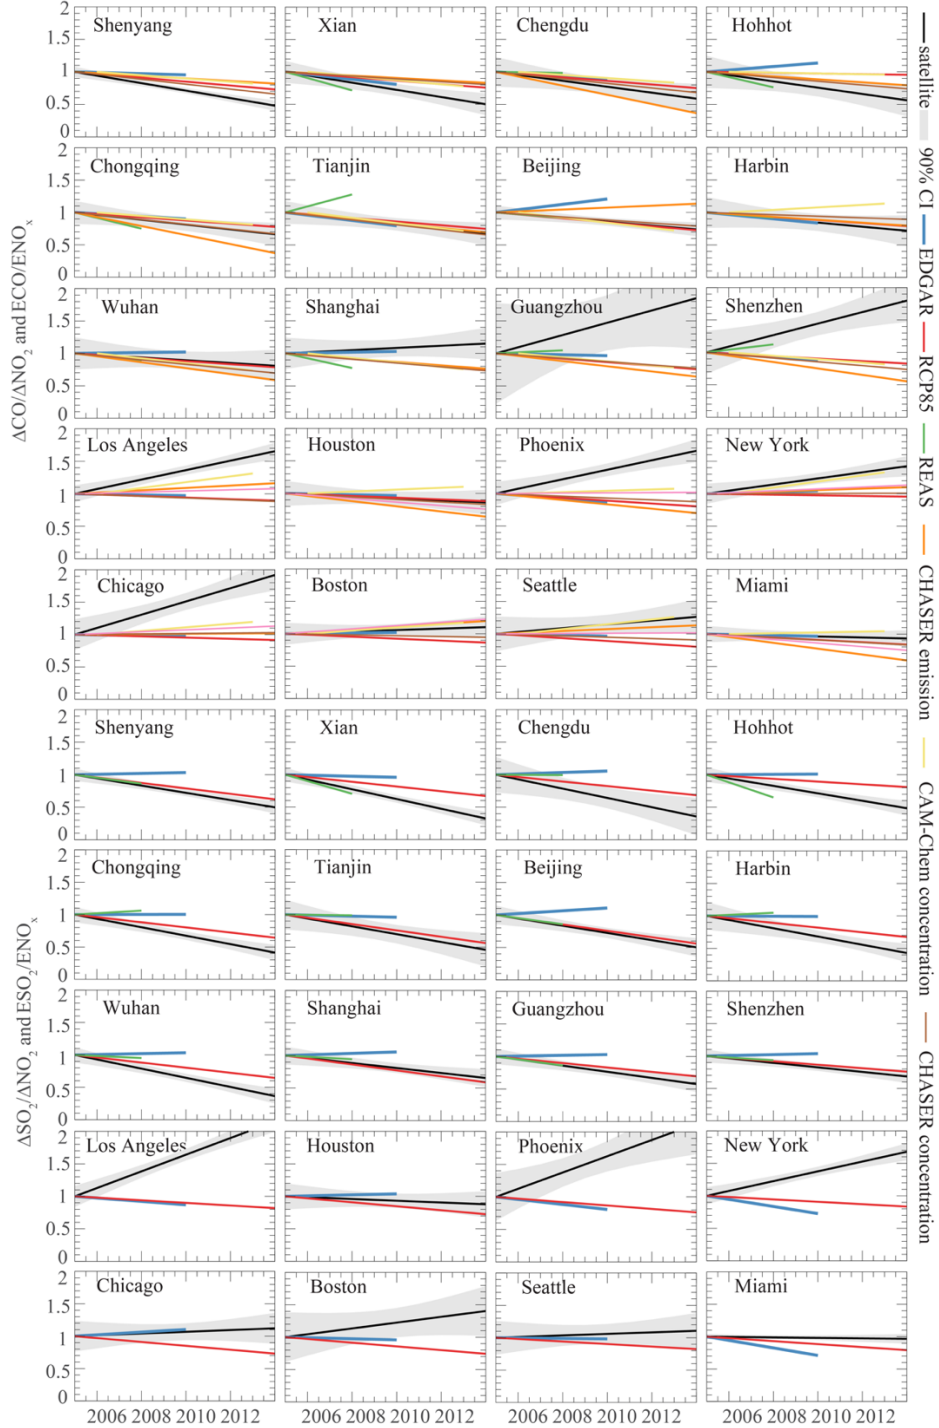

**Fig. S1.** Same as Figure 2 but for all the 12 Chinese cities and 8 U.S. cities.

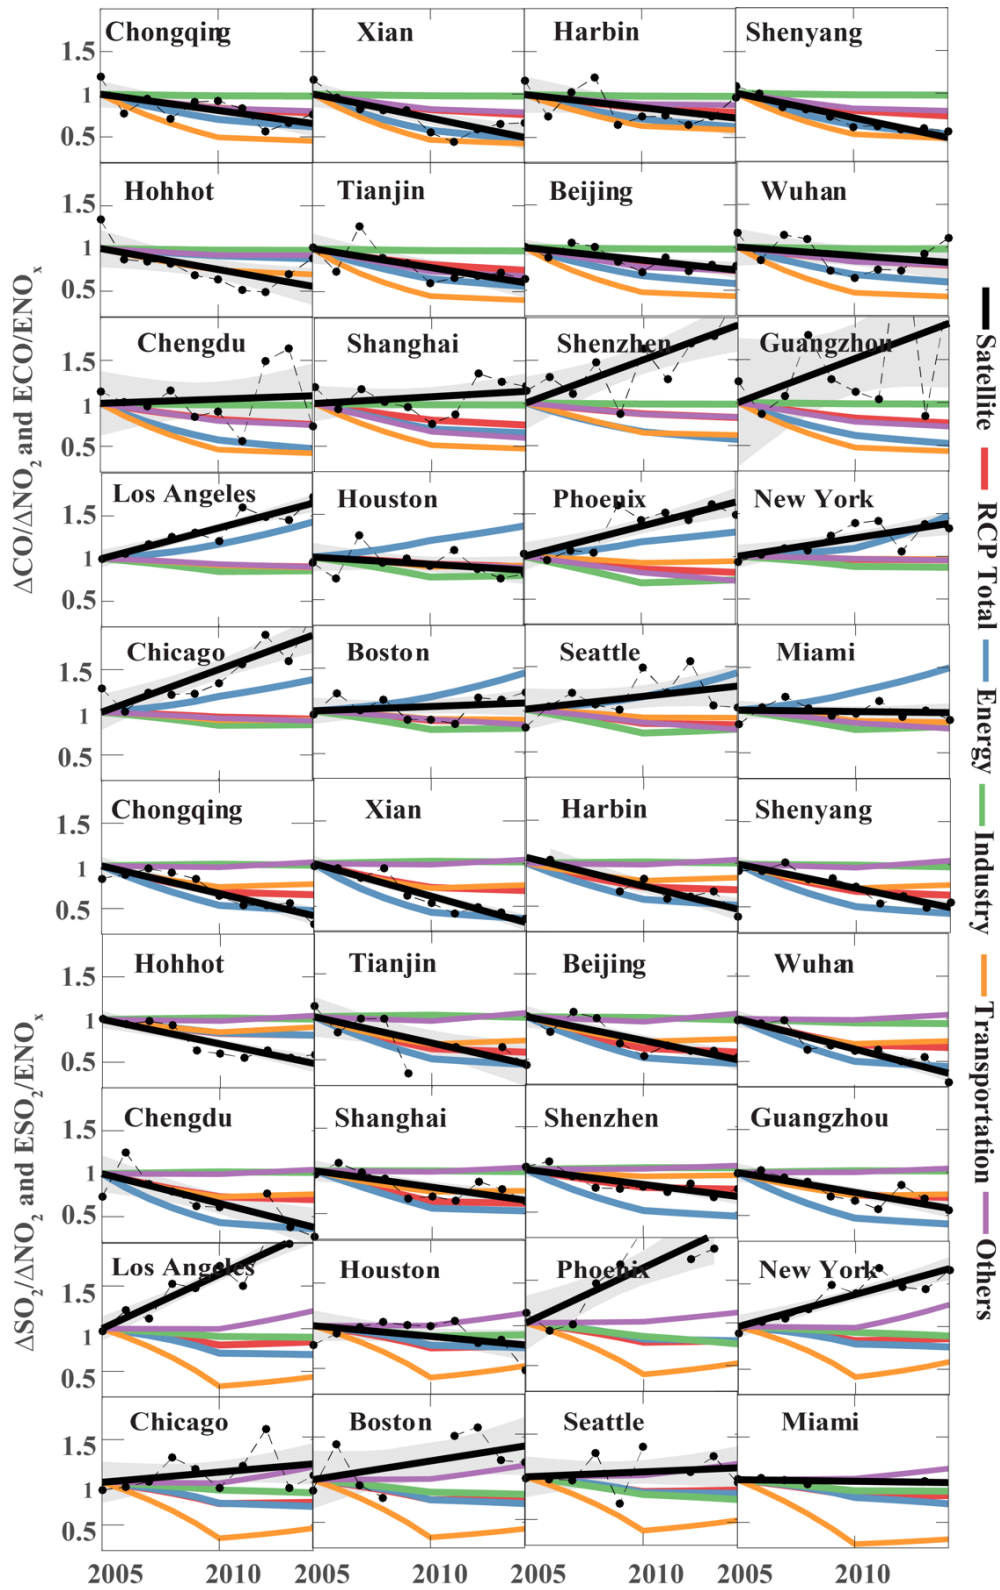

**Fig. S2. Comparisons between satellite-based ratios and sectoral emission ratios from RCP85 in 2005-2014.** Gray shade corresponds to the seasonal variability of the satellite-based ratios.
